# Supplementary material
Source: PubMed Central journal article supplement (PMC3659989)
Supplement: supp_2012.062547_2012.062547.ZANDBERG_SUPPL.pdf [file supp_2012.062547_2012.062547.ZANDBERG_SUPPL.pdf]

# Treatment and outcomes for chronic myelomonocytic leukemia compared to myelodysplastic syndromes in older adults

Dan P. Zandberg,<sup>1</sup> Ting-Ying Huang,<sup>2</sup> Xuehua Ke,<sup>2</sup> Maria R. Baer,<sup>1</sup> Steven D. Gore,<sup>3</sup> Sheila Weiss Smith,<sup>1,2</sup> and Amy J. Davidoff<sup>4</sup>

<sup>1</sup>Division of Hematology/Oncology, Department of Medicine, University of Maryland School of Medicine and Marlene and Stewart Greenebaum Cancer Center, University of Maryland, Baltimore MD, <sup>2</sup>Department of Pharmaceutical Health Services Research, University of Maryland School of Pharmacy, Baltimore, MD, <sup>3</sup>Department of Oncology, The Johns Hopkins University, Baltimore, MD and Division of Hematologic Malignancies, The Sidney Kimmel Comprehensive Cancer Center at Johns Hopkins, Baltimore, MD, <sup>4</sup>Agency for Healthcare Research and Quality, Center for Financing, Access, and Cost Trends, U.S. Department of Health and Human Services, Rockville, MD, USA

©2013 Ferrata Storti Foundation. This is an open-access paper. doi:10.3324/haematol.2012.062547

Online Supplementary Table S1. Characteristics of CMML and MDS Patients.

| Characteristics                                          | CMML (N=792)<br>% | MDS (N=7,385)<br>% | P       |
|----------------------------------------------------------|-------------------|--------------------|---------|
| Chronic myelomonocytic leukemia, NOS                     | 100.0             |                    |         |
| Myelodysplastic syndrome (MDS)                           |                   |                    |         |
| Lower-risk                                               |                   | 34.8               |         |
| RA                                                       |                   | 17.1               |         |
| RARS                                                     |                   | 11.6               |         |
| RCMD                                                     |                   | 4.5                |         |
| 5q Del                                                   |                   | 1.7                |         |
| Higher-risk                                              |                   |                    |         |
| RAEB                                                     |                   | 13.2               |         |
| Risk not specified                                       |                   | 52.0               |         |
| t-MDS                                                    |                   | 1.4                |         |
| MDS, NOS                                                 |                   | 50.6               |         |
| Sex (Male)                                               | 59.2              | 54.4               | 0.010   |
| Age at diagnosis                                         |                   |                    | ns      |
| <65                                                      | 2.5               | 4.2                |         |
| 65-69                                                    | 10.0              | 9.0                |         |
| 70-74                                                    | 16.9              | 16.7               |         |
| 75-79                                                    | 23.7              | 23.6               |         |
| 80-84                                                    | 25.9              | 24.9               |         |
| 85+                                                      | 21.0              | 21.6               |         |
| Race/ethnicity                                           |                   |                    | 0.010   |
| White, non-Hispanic                                      | 90.4              | 87.6               |         |
| Black, non-Hispanic                                      | 5.4               | 6.7                |         |
| Other                                                    | 4.2               | 5.7                |         |
| Other primary cancer (within 5 years prior to diagnosis) | 8.8               | 10.4               | ns      |
| Co-morbid conditions (12 months prior to diagnosis)      |                   |                    |         |
| Acute myocardial infarction                              | 2.7               | 3.34               | ns      |
| Chronic heart failure/ischemic heart disease             | 37.4              | 47.1               | <0.0001 |
| Conduction disorder                                      | 25.4              | 30.3               | 0.004   |
| Deep vein thrombosis/Pulmonary embolism                  | 3.8               | 3.6                | ns      |
| Hepatitis or other liver diseases                        | 2.8               | 4.8                | 0.010   |
| Renal disease                                            | 13.0              | 15.1               | ns      |
| Stroke                                                   | 7.8               | 9.1                | ns      |
| Alzheimer's disease                                      | 6.4               | 8.2                | 0.080   |
| Bipolar, major depression or schizophrenia               | 8.6               | 9.2                | ns      |
| Healthcare use (12 months prior to diagnosis)            |                   |                    |         |
| Hospitalization                                          | 38.5              | 43.2               | 0.012   |
| Oxygen and related supplies                              | 6.3               | 6.9                | ns      |
| Skilled nursing facility admission                       | 8.3               | 9.4                | ns      |
| Walking aids                                             | 6.8               | 7.3                | ns      |
| Wheelchair claims                                        | 4.8               | 6.8                | 0.033   |
| Nursing home stay                                        | 7.8               | 9.8                | 0.070   |

continued on the next page

continued from the previous page

|                                                |      |      |    |
|------------------------------------------------|------|------|----|
| Median household income quartiles (US Dollars) |      |      | ns |
| Lowest (less than or equal to \$35,386)        | 22.4 | 25.2 |    |
| Second (\$35,387-\$46,387)                     | 25.1 | 24.9 |    |
| Third (\$46,388-\$61,180)                      | 24.5 | 25.0 |    |
| Highest (more than \$61,180)                   | 27.7 | 24.6 |    |
| Year of diagnosis                              |      |      | ns |
| 2001                                           | 18.2 | 16.6 |    |
| 2002                                           | 18.4 | 17.9 |    |
| 2003                                           | 22.6 | 21.3 |    |
| 2004                                           | 20.5 | 23.1 |    |
| 2005                                           | 20.3 | 21.1 |    |

ns: non-significant,  $P > 0.10$ . NOS: not otherwise specified; RA: refractory anemia; RARS: refractory anemia with sideroblasts; RCMD: refractory cytopenia with multilineage dysplasia; 5q del: myelodysplastic syndrome with 5q deletion syndrome; RAEB: refractory anemia with excess blasts; t-MDS: therapy-related myelodysplastic syndrome. Source: Analysis of SEER-Medicare cases from 2001-2005; claims from 2000-2007.

Online Supplementary Table S2. Hazard Ratios (HR) for progression to AML or death.

|                                                            | CMML and MDS Cohort (N= 8,177) |         | HR   | P       | CMML Cohort (N= 792) |       |
|------------------------------------------------------------|--------------------------------|---------|------|---------|----------------------|-------|
|                                                            | HR                             | P       |      |         | HR                   | P     |
| <b>Independent variables</b>                               |                                |         |      |         |                      |       |
| Chronic myelomonocytic leukemia (CMML), NOS                | 2.22                           | <0.0001 | 3.19 | <0.0001 |                      |       |
| <b>Myelodysplastic syndrome (MDS)</b>                      |                                |         |      |         |                      |       |
| Lower-risk                                                 |                                |         |      |         |                      |       |
| RA                                                         |                                |         | -    | -       |                      |       |
| RARS                                                       |                                |         | 0.83 | 0.001   |                      |       |
| RCMD                                                       |                                |         | 1.47 | <0.0001 |                      |       |
| 5q Del                                                     |                                |         | 1.55 | <0.0001 |                      |       |
| Higher-risk                                                |                                |         |      |         |                      |       |
| RAEB                                                       |                                |         | 3.27 | <0.0001 |                      |       |
| Risk not specified                                         |                                |         |      |         |                      |       |
| t-MDS                                                      |                                |         | 1.92 | <0.0001 |                      |       |
| MDS, NOS                                                   |                                |         | 1.46 | <0.0001 |                      |       |
| <b>Patients' characteristic covariates</b>                 |                                |         |      |         |                      |       |
| Sex (Female)                                               | 0.79                           | <0.0001 | 0.80 | <0.0001 | 0.86                 | 0.060 |
| <b>Age at diagnosis</b>                                    |                                |         |      |         |                      |       |
| <65                                                        | 0.95                           | ns      | 0.92 | 0.329   | 0.89                 | ns    |
| 65-69                                                      | -                              | -       | -    | -       | -                    | -     |
| 70-74                                                      | 1.01                           | ns      | 0.99 | 0.877   | 1.02                 | ns    |
| 75-79                                                      | 1.03                           | ns      | 1.03 | 0.589   | 1.08                 | ns    |
| 80-84                                                      | 1.15                           | 0.007   | 1.16 | 0.005   | 1.11                 | ns    |
| 85+                                                        | 1.51                           | <0.0001 | 1.52 | <0.0001 | 1.50                 | 0.007 |
| <b>Race/ethnicity</b>                                      |                                |         |      |         |                      |       |
| White, non-Hispanic                                        | -                              | -       | -    | -       | -                    | -     |
| Black, non-Hispanic                                        | 0.83                           | 0.001   | 0.82 | 0.001   | 0.97                 | ns    |
| Other                                                      | 0.97                           | ns      | 0.99 | ns      | 1.39                 | 0.099 |
| <b>Median household income quartiles (US Dollars)</b>      |                                |         |      |         |                      |       |
| Lowest (less than or equal to \$35,386)                    |                                |         |      |         |                      |       |
| Second (\$35,387-\$46,387)                                 | 0.92                           | 0.018   | 0.91 | 0.013   | 0.66                 | 0.000 |
| Third (\$46,388-\$61,180)                                  | 0.91                           | 0.009   | 0.93 | 0.058   | 0.72                 | 0.006 |
| Highest (more than \$61,180)                               | 0.89                           | 0.002   | 0.90 | 0.004   | 0.77                 | 0.023 |
| Other primary cancer (within 5 years prior to diagnosis)   | 1.14                           | 0.002   | 1.13 | 0.005   | 1.02                 | ns    |
| Transfusion use prior to diagnosis                         | 1.28                           | <0.0001 | 1.29 | <0.0001 | 1.15                 | ns    |
| <b>Co-morbid conditions (12 months prior to diagnosis)</b> |                                |         |      |         |                      |       |
| Acute myocardial infarction                                | 1.00                           | ns      | 1.01 | ns      | 1.28                 | ns    |
| Chronic heart failure/ischemic heart disease               | 1.01                           | ns      | 1.03 | ns      | 0.78                 | 0.007 |
| Conduction disorder                                        | 1.07                           | 0.023   | 1.08 | 0.012   | 1.06                 | ns    |
| Deep vein thrombosis/pulmonary embolism                    | 1.10                           | ns      | 1.08 | ns      | 1.22                 | ns    |
| Hepatitis or other liver diseases                          | 1.18                           | 0.006   | 1.14 | 0.034   | 1.15                 | ns    |
| Renal disease                                              | 1.03                           | ns      | 1.04 | ns      | 1.22                 | ns    |
| Stroke                                                     | 0.97                           | ns      | 0.98 | ns      | 1.14                 | ns    |
| Alzheimer disease                                          | 1.25                           | <0.0001 | 1.29 | <0.0001 | 1.02                 | ns    |
| Bipolar, major depression or schizophrenia                 | 1.09                           | 0.067   | 1.10 | 0.046   | 1.11                 | ns    |
| <b>Healthcare use (12 months prior to diagnosis)</b>       |                                |         |      |         |                      |       |
| Hospitalization                                            | 1.07                           | 0.052   | 1.07 | 0.042   | 1.08                 | ns    |
| Oxygen and related supplies                                | 1.31                           | <0.0001 | 1.32 | <0.0001 | 1.13                 | ns    |
| Skilled nursing facility admission                         | 0.93                           | ns      | 0.98 | ns      | 0.97                 | ns    |
| Walking aids                                               | 0.92                           | 0.086   | 0.92 | 0.088   | 1.07                 | ns    |
| Wheelchair claims                                          | 1.26                           | <0.0001 | 1.25 | <0.0001 | 1.23                 | ns    |
| Nursing home stay                                          | 1.24                           | 0.002   | 1.21 | 0.008   | 0.96                 | ns    |
| Had Medicaid in the year prior to diagnosis                | 0.99                           | ns      | 1.02 | ns      | 1.05                 | ns    |
| <b>Year of diagnosis</b>                                   |                                |         |      |         |                      |       |
| 2001                                                       | -                              | -       | -    | -       | -                    | -     |
| 2002                                                       | 0.95                           | ns      | 0.94 | ns      | 1.15                 | ns    |
| 2003                                                       | 0.91                           | 0.027   | 0.92 | 0.035   | 0.88                 | ns    |
| 2004                                                       | 0.90                           | 0.011   | 0.91 | 0.022   | 0.94                 | ns    |
| 2005                                                       | 0.96                           | ns      | 0.93 | 0.090   | 1.04                 | ns    |

\*. - means that the reference category for the hazard ratio. CMML: chronic myelomonocytic leukemia; MDS: myelodysplastic syndrome; AML: acute myeloid leukemia. NOS: not otherwise specified; RA: refractory anemia; RARS: refractory anemia with sideroblasts; RCMD: refractory cytopenia with multilineage dysplasia; 5q del: myelodysplastic syndrome with 5q deletion syndrome; RAEB: refractory anemia with excess blasts; t-MDS: therapy-related myelodysplastic syndrome. Source: Analysis of SEER-Medicare cases from 2001-2005; claims from 2000-2007.
