# Supplementary material
Source: PubMed Central journal article supplement (PMC3659989)
Supplement: supp_2012.062547_2012_062547-Contributions.pdf [file supp_2012.062547_2012_062547-Contributions.pdf]

**Manuscript no. HAEMATOL/2012/062547 entitled “Treatment and outcomes for chronic myelomonocytic leukemia compared to myelodysplastic syndromes in older adults“**

**Authors: Dan P. Zandberg, Tin-Ying Huang, Xuehua Ke, Maria R. Baer, Steven D. Gore, Sheila Weiss Smith, Amy J. Davidoff**

**Information about the contributions of each person named as having participated in the study**

**1) Guarantor(s), i.e., person(s) who is (are) responsible for the integrity of the work as a whole:**

- Dan P. Zandberg, University of Maryland Greenebaum Cancer Center, dzandberg@umm.edu
- Amy J. Davidoff, Agency for Healthcare Research and Quality, Center for Financing, Access, and Cost Trends, U.S. Department of Health and Human Services, adavidof@rx.umaryland.edu

According to the International Committee of Medical Journal Editors (ICMJE)

([http://www.icmje.org/ethical\\_1author.html](http://www.icmje.org/ethical_1author.html)): “Authorship credit should be based on: 1) substantial contributions to conception and design, acquisition of data, or analysis and interpretation of data; 2) drafting the article or revising it critically for important intellectual content; and 3) final approval of the version to be published. Authors should meet conditions 1, 2, and 3 ..... Acquisition of funding, collection of data, or general supervision of the research group alone does not constitute authorship”.

**The guarantors of this manuscript confirm that all persons designated as authors qualify for authorship, and that each author has participated sufficiently in the work to take public responsibility for appropriate portions of the content.**

**2) Authors who participated in the conception of the study:**

- Dan P. Zandberg, Tin-Ying Huang, Xuehua Ke, Maria R. Baer, Steven D. Gore, Sheila Weiss Smith, Amy J. Davidoff

**3) Design & Methods. The following authors were responsible for specific investigations:**

- Dan P. Zandberg, Tin-Ying Huang, Xuehua Ke, Maria R. Baer, Steven D. Gore, Sheila Weiss Smith, Amy J. Davidoff were all involved in the design and methodology of the study

**4) Results. The following authors were responsible for specific portions of the results, including figures and tables:**

- Dan P. Zandberg, Tin-Ying Huang, Xuehua Ke

**5) Writing the manuscript. The following authors were responsible for writing the manuscript:**

- Dan P. Zandberg, Tin-Ying Huang, Xuehua Ke, Maria R. Baer, Amy J. Davidoff

**6) Contributors Listed in Acknowledgments: None**
